# Supplementary material for: Luminescent metal–organic framework-functionalized graphene oxide nanocomposites and the reversible detection of high explosives
Source: Royal Society of Chemistry journal article supplement (doi:10.1039/c3nr01439h), 2013-01-01
Supplement: c3nr01439h.pdf [file c3nr01439h.pdf]

**【Electronic Supplementary Information】**

Luminescent Metal-Organic Framework-Functionalized  
Graphene Oxide Nanocomposites and Reversible  
Detection of High Explosives

*Ji Ha Lee,<sup>a</sup> Justyn Jaworski\*<sup>b</sup> and Jong Hwa Jung\*<sup>a</sup>*

<sup>a</sup>Department of Chemistry and Research Institute of Natural Sciences Gyeongsang National  
University, Jinju 660-701, Korea

<sup>b</sup>Department of Chemistry Chemical Engineering, Hanyang University, Seoul 133-791  
(Korea)

E-mail: [jonghwa@gnu.ac.kr](mailto:jonghwa@gnu.ac.kr) (J. H. Jung)

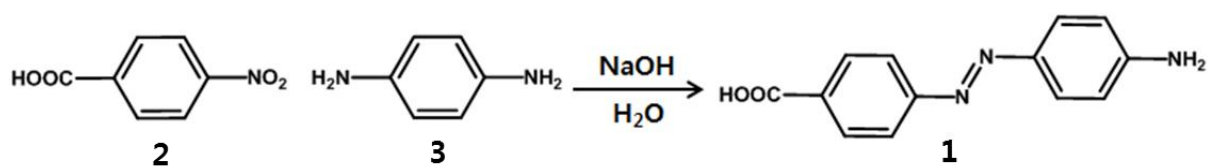

**Scheme S1** Synthetic route of compound 1.

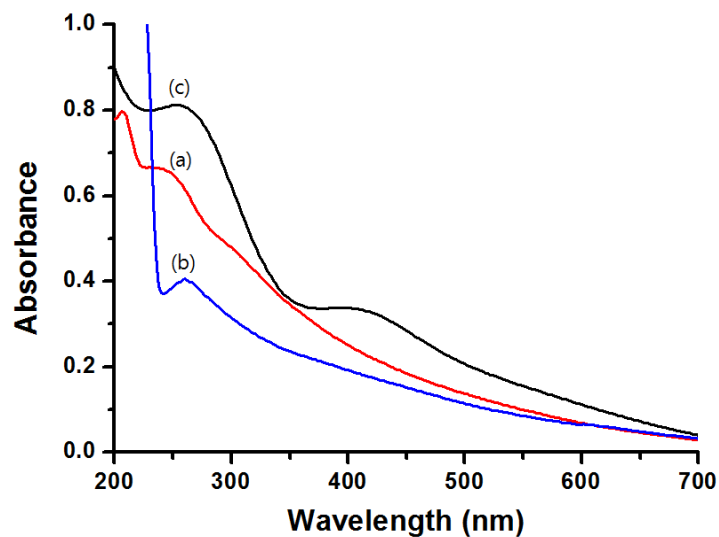

**Fig. S1** UV-vis spectra of (a) graphene oxide (GO), (b) reduced graphene oxide (r-GO) and (c) azobenzoic acid-functionalized graphene oxide (A-GO) in water.

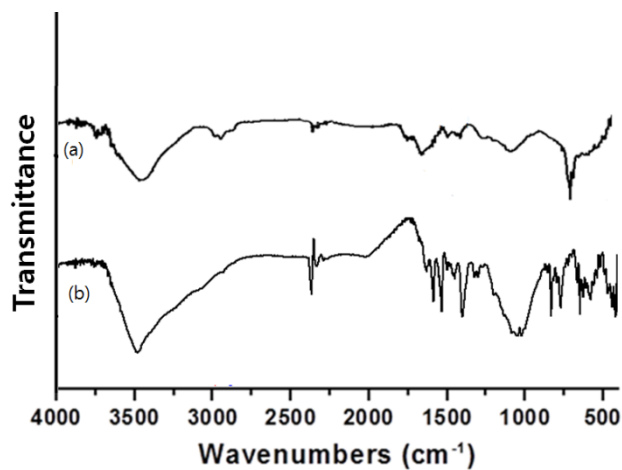

**Fig. S2** FT IR spectra of (a) reduced graphene oxide (r-GO) and (b) azobenzoic acid-functionalized graphene oxide (A-GO).

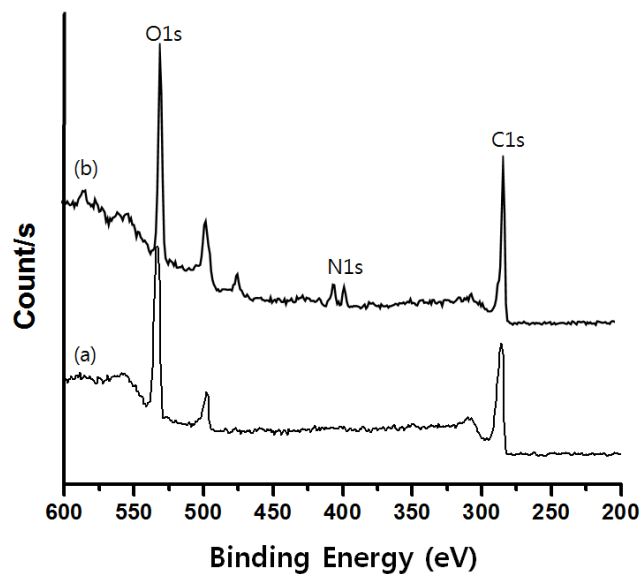

**Fig. S3** XPS spectra of (a) reduced graphene oxide (r-GO) and (b) azobenzoic acid-functionalized graphene oxide (A-GO).

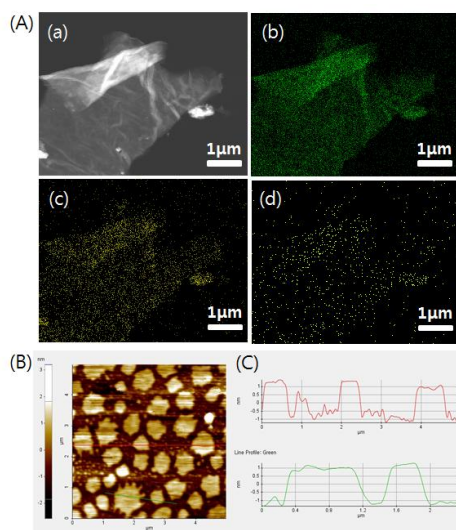

**Fig. S4** (A) TEM image with electron energy loss spectroscopy (EELS) of azobenzoic acid-functionalized graphene oxide; (a) zero-loss image, (b) carbon, (c) oxygen, and (d) nitrogen components. (B) AFM image of azobenzoic acid-functionalized graphene oxide and (C) its height profile.

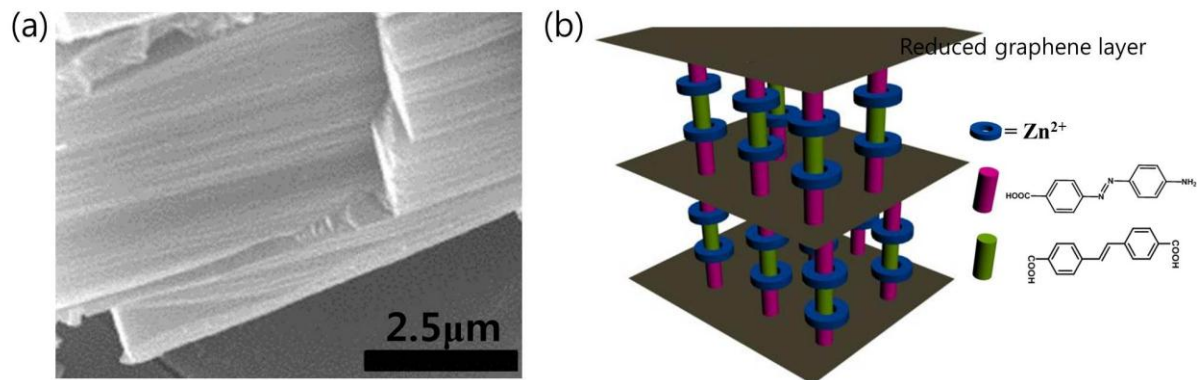

**Fig. S5** (a) High magnification SEM image of the multi-layered structure of nanocomposite **1**.  
(b) Representation for the multi-layered structure of nanocomposite **1**.

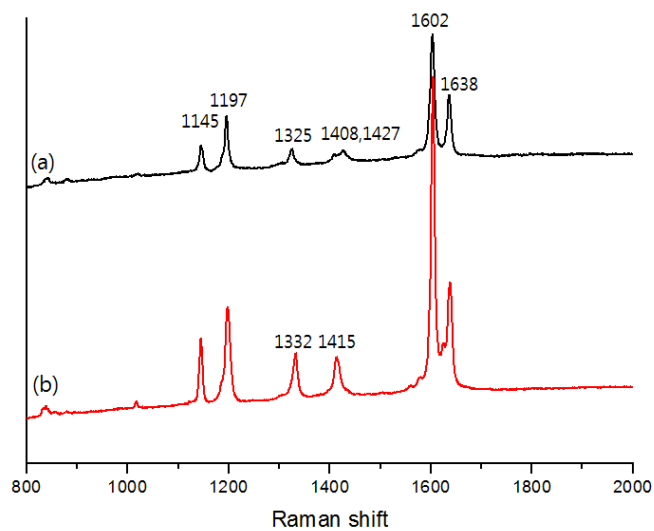

**Fig. S6** Micro-Raman spectra of (a) crystal L-Zn<sup>2+</sup> and (b) nanocomposite of A-GO/L-Zn<sup>2+</sup>.

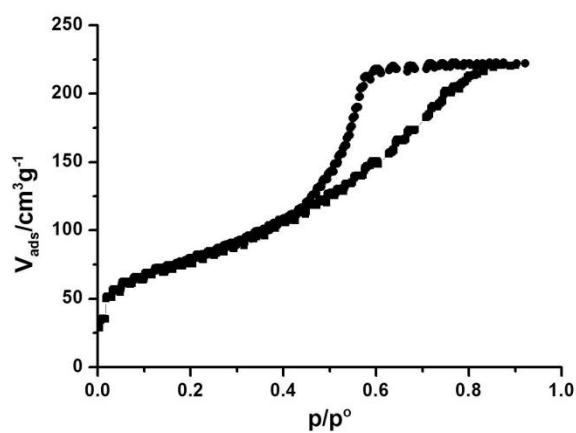

**Fig. S7** The  $\text{N}_2$  adsorption-desorption isotherm of nanocomposite **1** obtained at 77K.

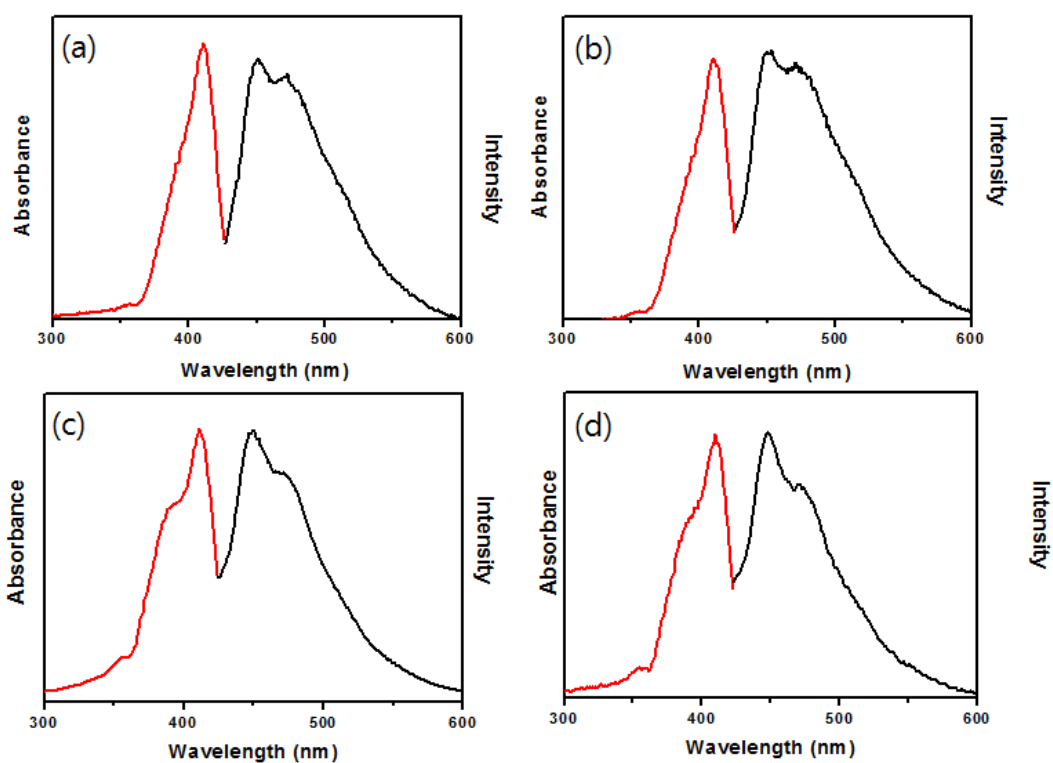

**Fig. S8** Excitation (red) and emission (black) spectra of (a) crystal  $\text{L-Zn}^{2+}$  and the nanocomposites of A-GO/ $\text{L-Zn}^{2+}$  (b) 1:5, (c) 1:4, and (d) 1:3 wt% with various ratios in the two components.
